# Supplementary material for: AIE-active β-diketones containing pyridiniums: fluorogenic binding to cellulose and water-vapour-recoverable mechanochromic luminescence
Source: Royal Society of Chemistry journal article supplement (doi:10.1039/c6qm00187d), 2016-10-10
Supplement: c6qm00187d1.pdf [file c6qm00187d1.pdf]

Electronic supplementary information for

# AIE-Active $\beta$ -diketones Containing Pyridiniums: Fluorogenic Binding to Cellulose and Water-Vapour-Recoverable Mechanochromic Luminescence

Tongqing Xie,<sup>a,b</sup> Baicheng Zhang,<sup>a</sup> Xuepeng Zhang,<sup>\*a</sup> and Guoqing Zhang<sup>\*a</sup>

<sup>a</sup> Hefei National Laboratory for Physical Sciences at the Microscale, University of Science and Technology of China, 96 Jinzhai Road, Hefei, Anhui, 230026, China

E-mail: gzhang@ustc.edu.cn

<sup>b</sup> CAS Key Laboratory of Soft Matter Chemistry, Department of Polymer Science and Engineering, University of Science and Technology of China, Hefei, 230026 Anhui, China

## Materials

Tetrahydrofuran (THF) and toluene were distilled by refluxing with sodium for 3 h before use. Sodium hydride (95%) and boron trifluoride diethyl etherate (99.8%, purified by redistillation) were purchased from Sigma–Aldrich. All other reagents and solvents were obtained from Aladdin Reagent (Shanghai) and were used as received.

## Methods

<sup>1</sup>H NMR (400 MHz) spectra were recorded on a Bruker AV300 NMR spectrometer operated in the Fourier transform mode. <sup>1</sup>H NMR spectra were referenced to the signal for residual protiochloroform at 7.26 ppm and coupling constants are given in hertz. UV–vis absorption spectra were recorded on a Beijing Persee TU-1901 UV–vis spectrometer. Photographs were taken by a Cannon 500D digital camera. Steady-state emission spectra were recorded on a Horiba FluoroMax-4 spectrofluorometer (Japan). Fluorescence lifetime data were acquired with a 1 MHz LED laser with the excitation peak at 372 nm (NanoLED-370). Lifetime data were analyzed with DataStation v6.6 (Horiba Scientific).

## Synthesis

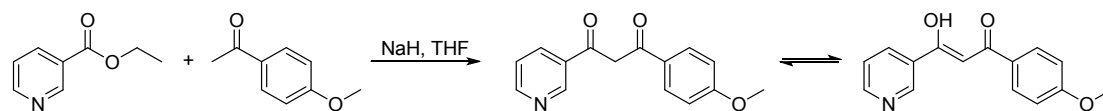

To a dried round-bottom flask, 4-methoxyacetophenone (1.50 g, 10 mmol), ethyl nicotinate (6.05 g, 40 mmol), THF (10 mL) and sodium hydride (95%, 0.51 g, 20 mmol) were added successively at room temperature. The mixture was refluxed for 6 h. After cooling to room temperature, the reaction was quenched with saturated NaHCO<sub>3</sub> aqueous solution and the solvent was removed in vacuo. The mixture was extracted with ethyl acetate (50 mL  $\times$  3). The organic phase were combined, dried over Na<sub>2</sub>SO<sub>4</sub> and concentrated under reduced pressure. The final product was

obtained by recrystallization in ethyl acetate (2.30 g, 90%).

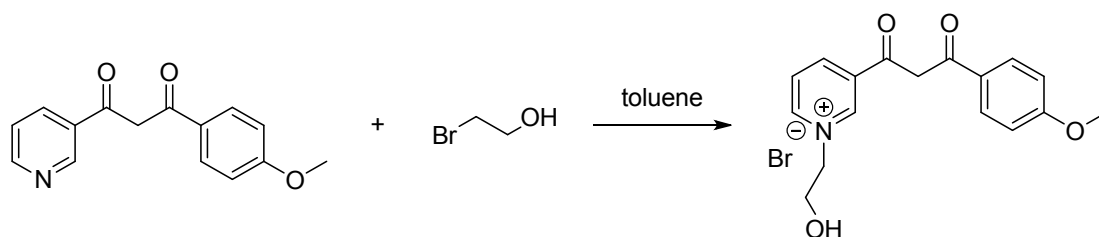

1-(4-Methoxyphenyl)-3-(pyridin-3-yl)propane-1,3-dione (0.51 g, 2.0 mmol) and 2-bromoethanol (98%, 0.51 g, 4.0 mmol) were dissolved in toluene (10 mL) and the mixture was refluxed for 24 h. After cooling to room temperature, the reaction mixture was filtered and the residue was washed with toluene to afford the product as a pale green solid (0.70 g, 92%).

**1:**  $\delta$  (400 MHz, DMSO- $d_6$ ) 16.93 (1 H, s), 9.70 (1 H, s), 9.27 (1 H, d,  $J$  8.3), 9.18 (1 H, d,  $J$  6.0), 8.36 (1 H, dd,  $J$  8.1, 6.1), 8.23 (2 H, d,  $J$  8.9), 7.55 (1 H, s), 7.18 (2 H, d,  $J$  8.9), 5.30 (1 H, s), 4.79 (2 H, t), 3.94 (2 H, t), 3.89 (3 H, s). HRMS (APCI)  $m/z$  calcd for  $C_{17}H_{18}NO_4^+$ , 300.12303; found 300.12271.

Compounds **2**, **3**, **4**, **5**, **6** were synthesized following the same procedure as **1**.

**2** (yield 90%):  $\delta$  (400 MHz, DMSO- $d_6$ ) 16.90 (1 H, s), 9.81 (1 H, s), 9.29 (1 H, d,  $J$  6.0), 9.21 (1 H, d,  $J$  8.2), 8.35 (1 H, dd,  $J$  8.0, 6.2), 8.24 (2 H, d,  $J$  8.9), 7.56 (1 H, s), 7.18 (2 H, d,  $J$  8.9), 4.76 (2 H, q,  $J$  7.3), 3.91 (3 H, s), 1.62 (3 H, t,  $J$  7.3). HRMS (APCI)  $m/z$  calcd for  $C_{17}H_{18}NO_3^+$ , 284.12812; found 284.12778.

**3** (yield 87%):  $\delta$  (400 MHz, DMSO- $d_6$ ) 16.59 (1 H, s), 9.76 (1 H, s), 9.25 (2 H, dd,  $J$  30.2, 7.1), 8.38 (1 H, dd,  $J$  8.0, 6.1), 8.24 (2 H, d,  $J$  7.4), 7.75 (1 H, t,  $J$  7.3), 7.70-7.61 (3 H, m), 5.30 (1 H, s), 4.81 (2 H, t), 3.95 (2 H, t). HRMS (APCI)  $m/z$  calcd for  $C_{16}H_{16}NO_3^+$ , 270.11247; found 270.12212.

**4** (yield 90%):  $\delta$  (400 MHz, DMSO- $d_6$ ) 16.89 (1 H, s), 9.67 (1 H, s), 9.27 (1 H, d,  $J$  8.5), 9.18 (1 H, d,  $J$  6.1), 8.39-8.33 (1 H, m), 8.22 (2 H, d,  $J$  8.9), 7.54 (1 H, s), 7.19 (2 H, d,  $J$  9.0), 5.29 (1 H, t,  $J$  5.3), 4.78 (2 H, t), 3.97-3.92 (2 H, m), 3.89 (3 H, s). HRMS (APCI)  $m/z$  calcd for  $C_{17}H_{18}NO_4^+$ , 300.12303; found 300.12283.

**5** (yield 83%):  $\delta$  (400 MHz, DMSO- $d_6$ ) 16.76 (1 H, s), 9.76 (1 H, s), 9.31 (1 H, d,  $J$  8.2), 9.21 (1 H, d,  $J$  6.0), 8.86 (1 H, s), 8.39 (1 H, dd,  $J$  8.0, 6.2), 8.21 (1 H, dd,  $J$  8.7, 1.6), 8.06 (2 H, dd,  $J$  20.2, 8.9), 7.73 (1 H, s), 7.49 (1 H, d,  $J$  2.1), 7.33 (1 H, dd,  $J$  9.0, 2.4), 5.32 (1 H, s), 4.82 (2 H, t), 3.95 (5 H, s). HRMS (APCI)  $m/z$  calcd for  $C_{21}H_{20}NO_4^+$ , 350.13868; found 350.13846.

**6** (yield 85%):  $\delta$  (400 MHz, DMSO- $d_6$ ) 9.76 (1 H, s), 9.30 (1 H, d,  $J$  8.1), 9.21 (1 H, d,  $J$  6.0), 8.96 (1 H, d,  $J$  9.4), 8.64 (1 H, d,  $J$  8.1), 8.54-8.29 (7 H, m), 8.21 (1 H, t,  $J$  7.6), 7.60 (1 H, s), 5.31 (1 H, s), 4.80 (2 H, t), 3.95 (2 H, s). HRMS (APCI)  $m/z$  calcd for  $C_{26}H_{20}NO_3^+$ , 394.14377; found 394.14349.

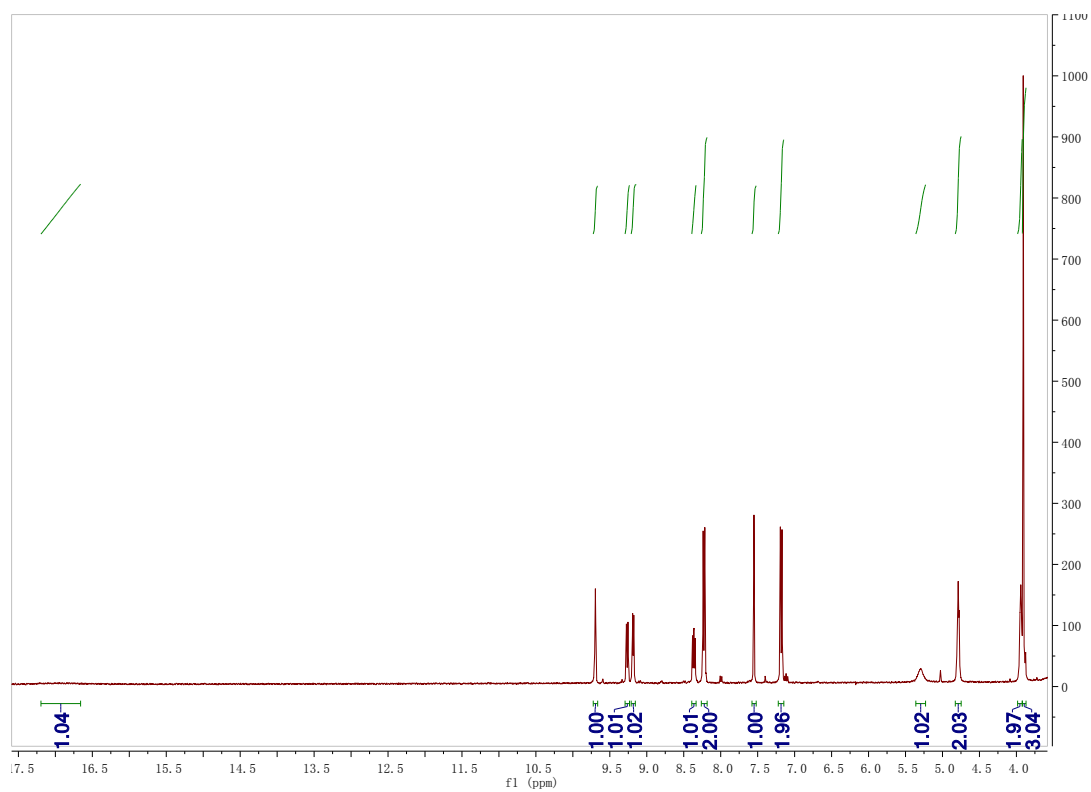

Figure S1.  $^1\text{H}$  NMR spectra of **1** in  $\text{DMSO-d}_6$ .

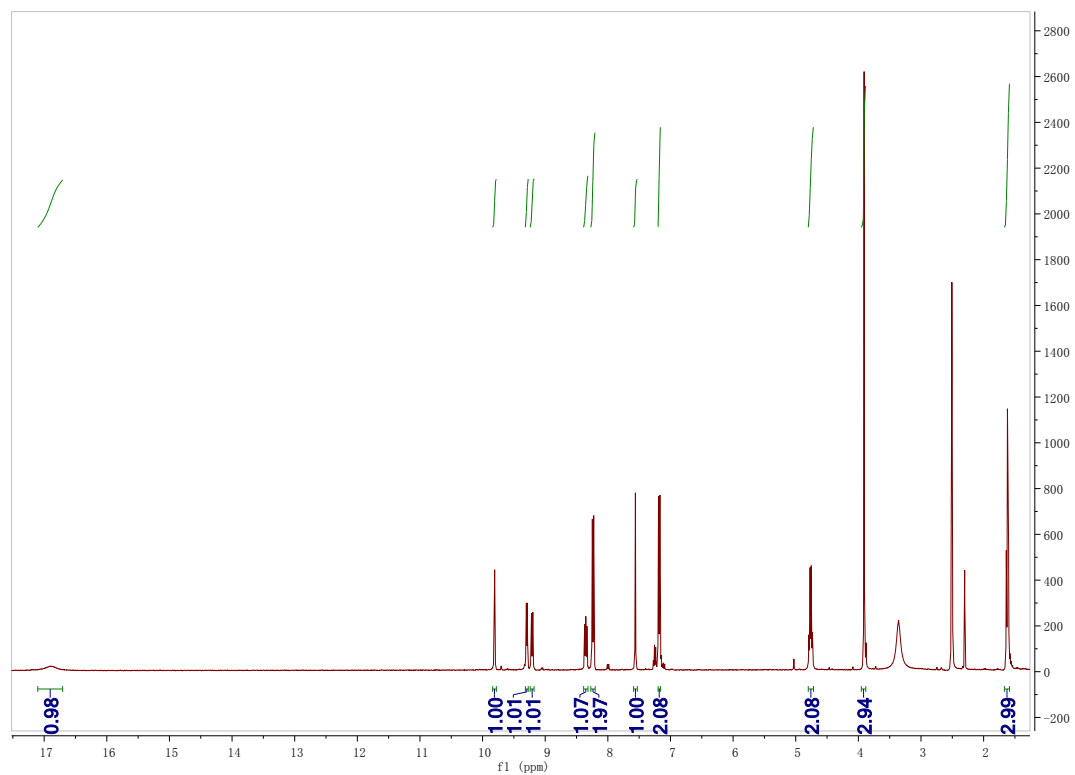

Figure S2.  $^1\text{H}$  NMR spectra of **2** in  $\text{DMSO-d}_6$ .

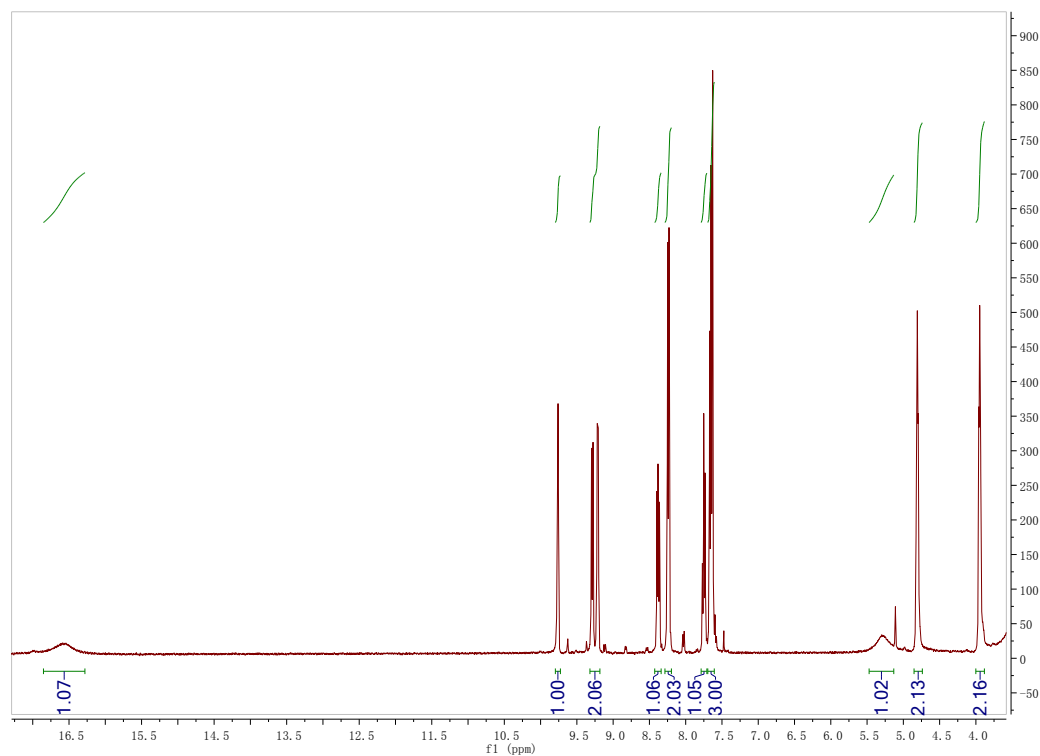

Figure S3.  $^1\text{H}$  NMR spectra of **3** in  $\text{DMSO-d}_6$ .

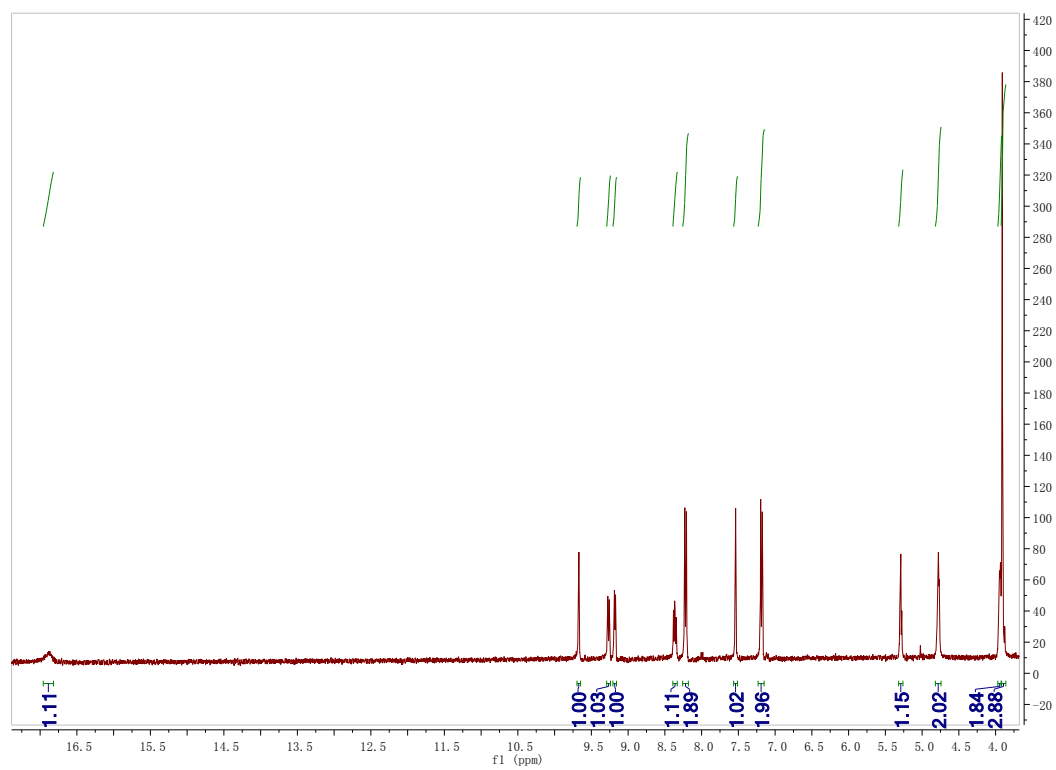

Figure S4.  $^1\text{H}$  NMR spectra of **4** in  $\text{DMSO-d}_6$ .

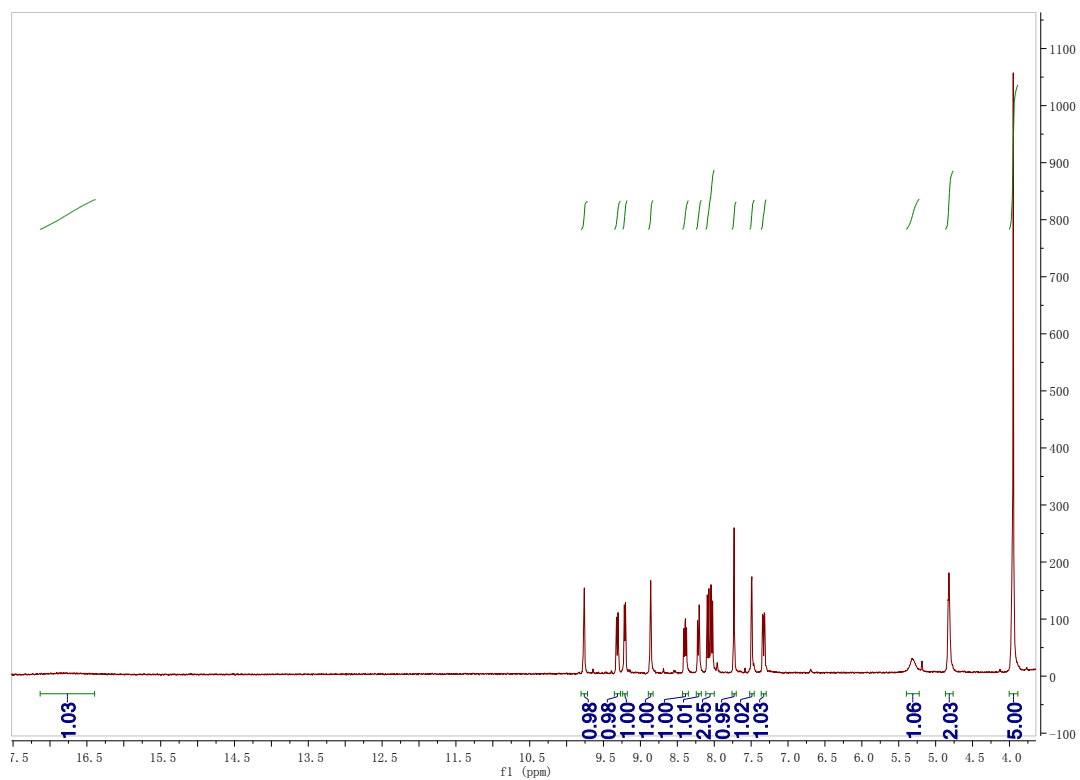

Figure S5.  $^1\text{H}$  NMR spectra of **5** in  $\text{DMSO-d}_6$ .

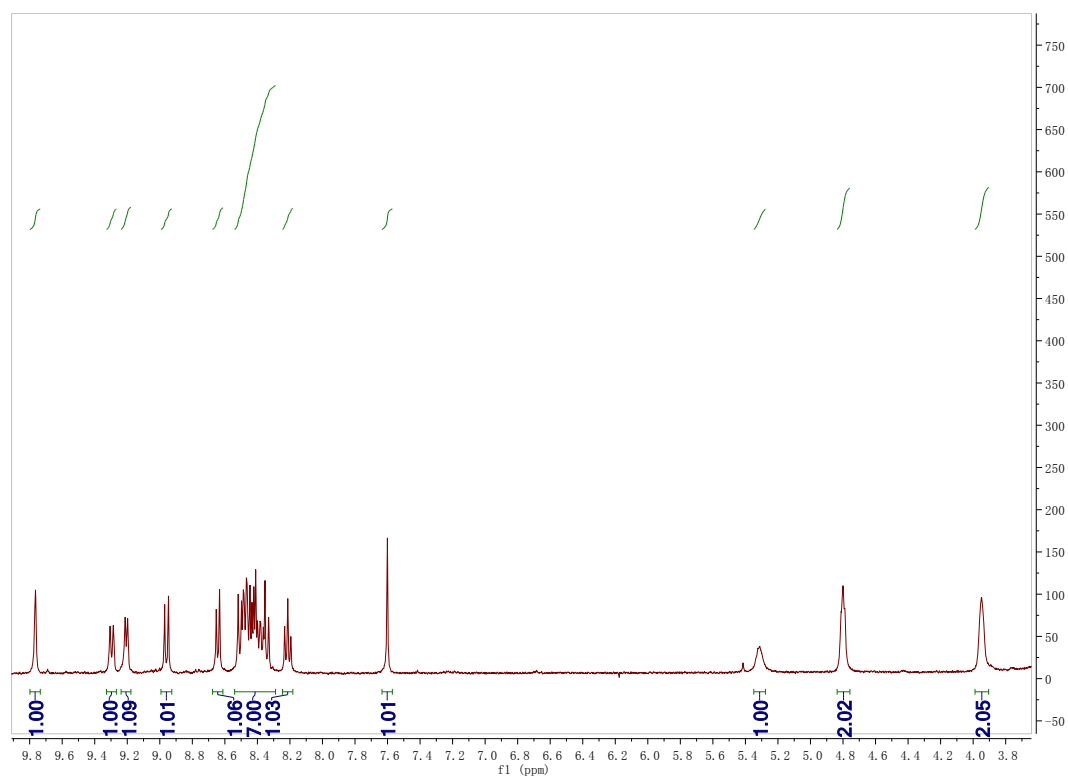

Figure S6.  $^1\text{H}$  NMR spectra of **6** in  $\text{DMSO-d}_6$ .

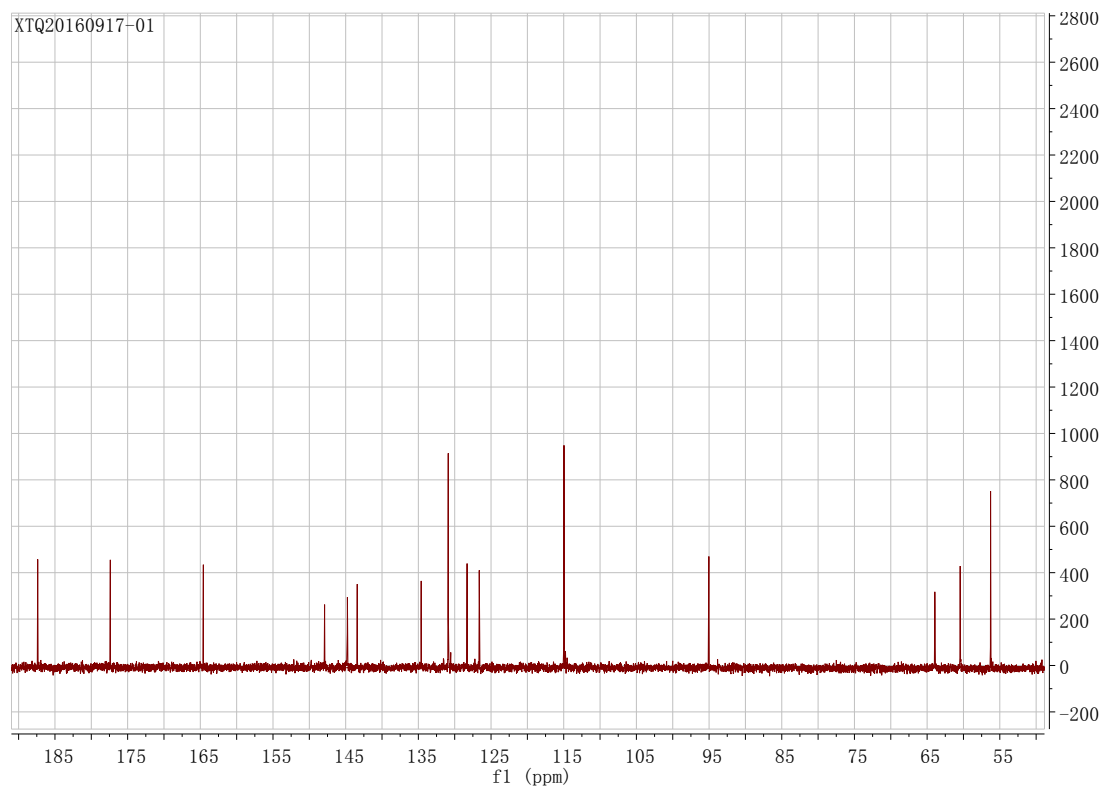

Figure S7.  $^{13}\text{C}$  NMR spectra of **1** in  $\text{DMSO-d}_6$ .

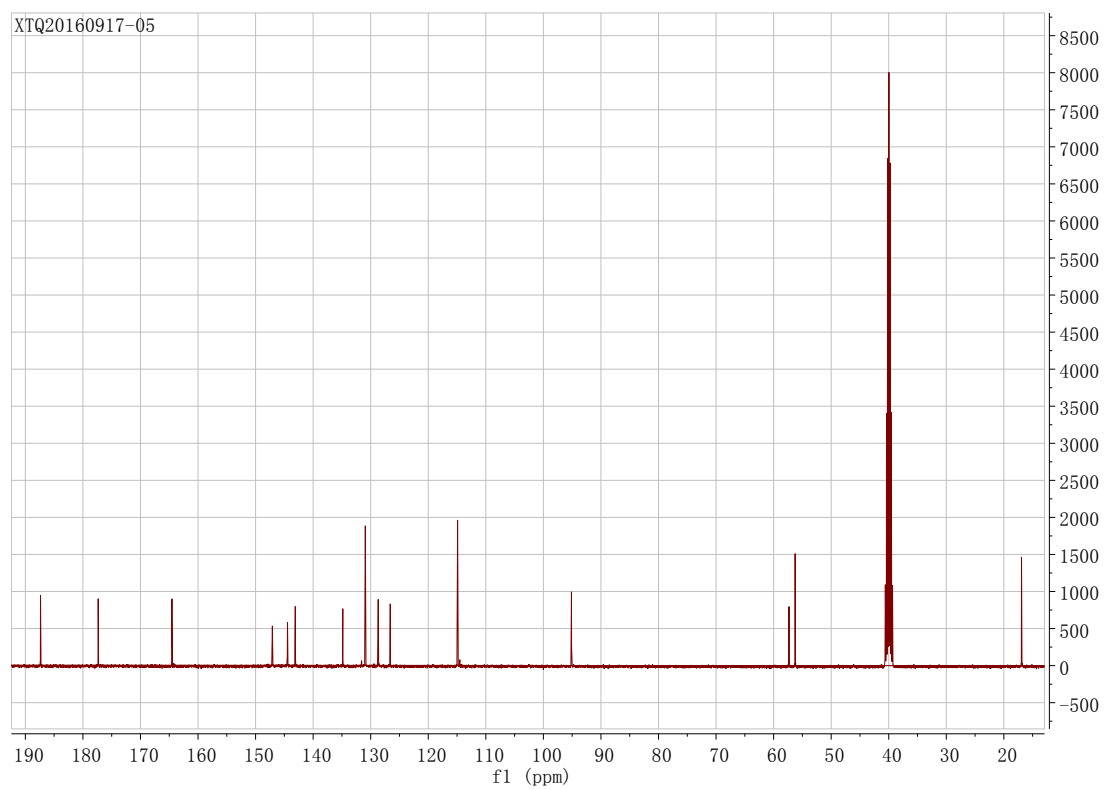

Figure S8.  $^{13}\text{C}$  NMR spectra of **2** in  $\text{DMSO-d}_6$ .

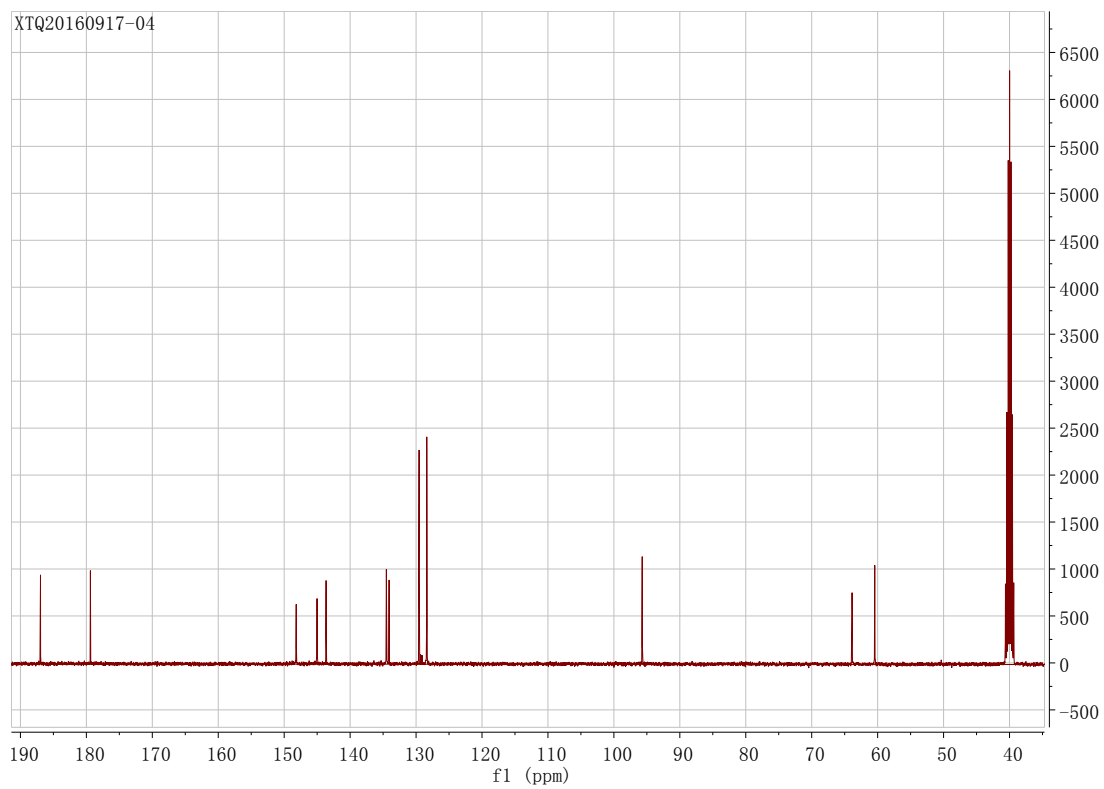

Figure S9.  $^{13}\text{C}$  NMR spectra of **3** in  $\text{DMSO-d}_6$ .

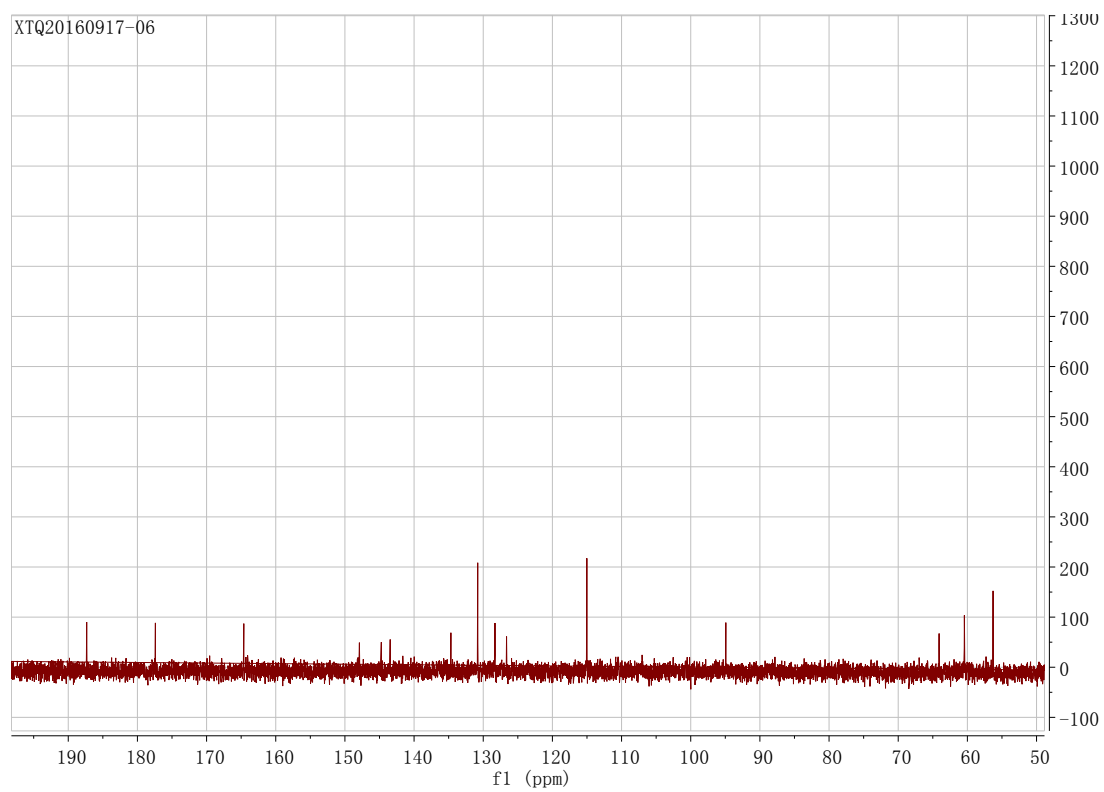

Figure S10.  $^{13}\text{C}$  NMR spectra of **4** in  $\text{DMSO-d}_6$ .

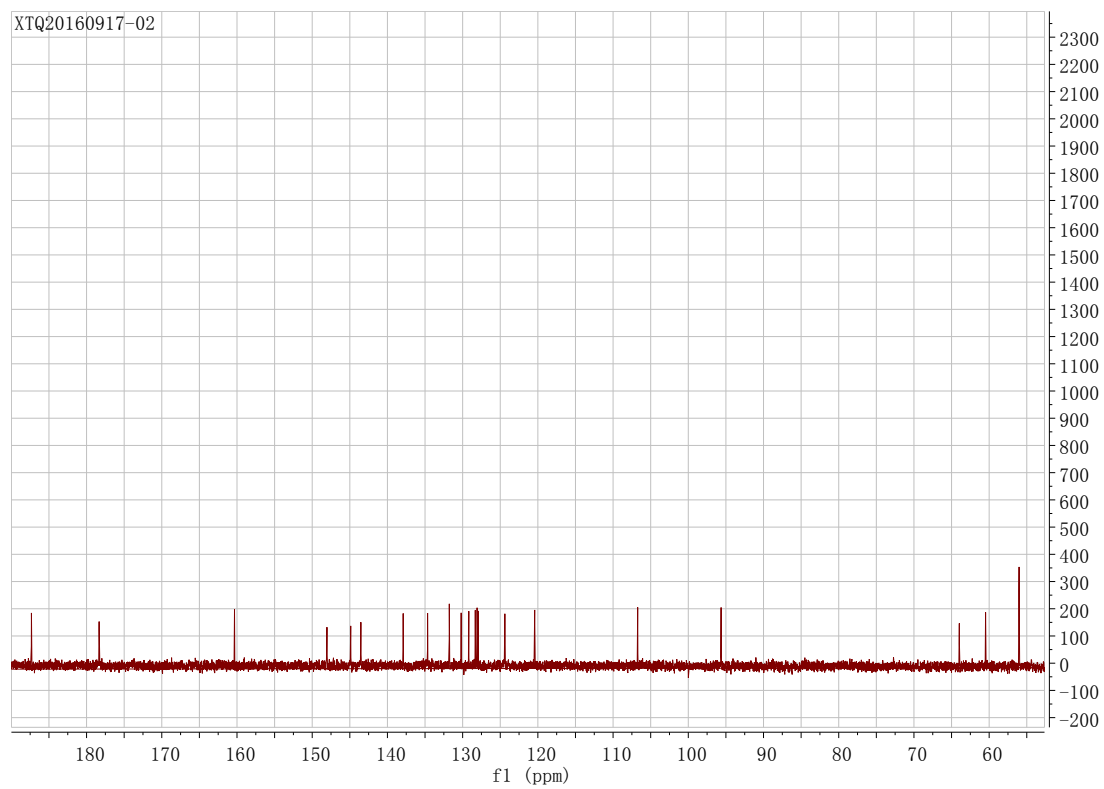

Figure S11. <sup>13</sup>C NMR spectra of **5** in DMSO-d<sub>6</sub>.

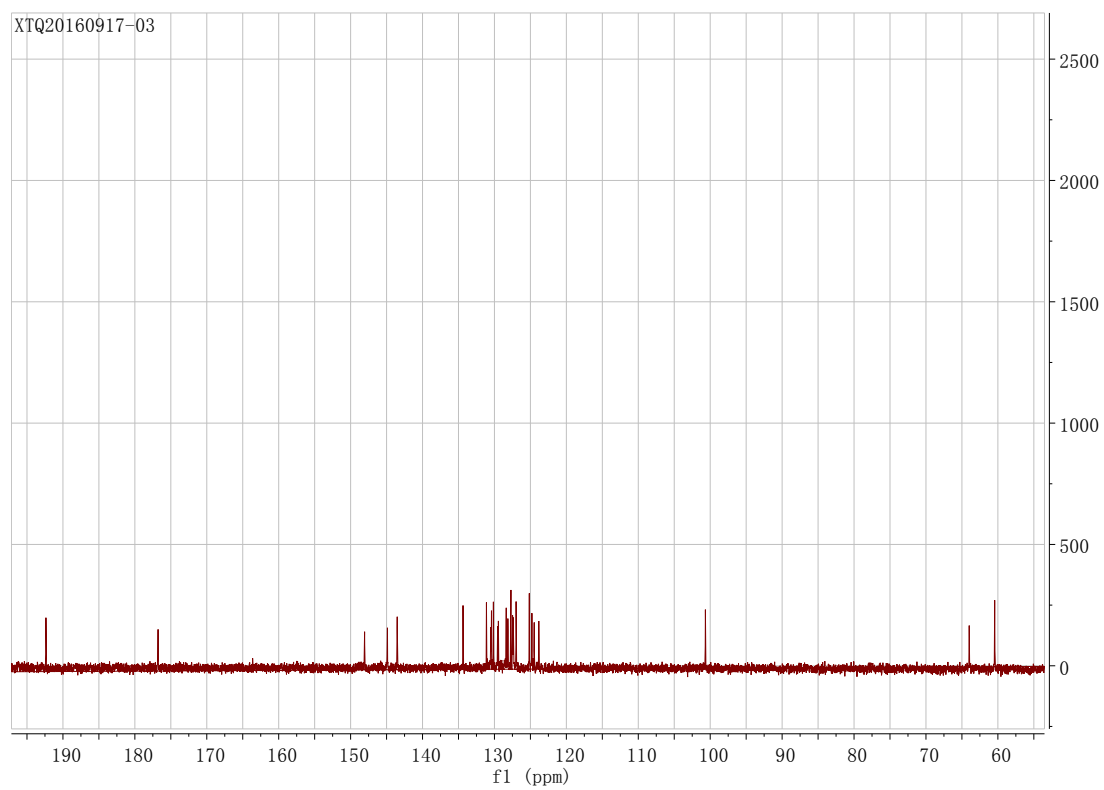

Figure S12. <sup>13</sup>C NMR spectra of **6** in DMSO-d<sub>6</sub>.



Table S1 Crystal data and structure refinement for **1**.

|                                             |                                                   |
|---------------------------------------------|---------------------------------------------------|
| Identification code                         | xtq0427                                           |
| Empirical formula                           | C <sub>17</sub> H <sub>20</sub> BrNO <sub>5</sub> |
| Formula weight                              | 398.25                                            |
| Temperature/K                               | 290(2)                                            |
| Crystal system                              | triclinic                                         |
| Space group                                 | P-1                                               |
| a/Å                                         | 5.2286(5)                                         |
| b/Å                                         | 8.3500(6)                                         |
| c/Å                                         | 20.2441(18)                                       |
| α/°                                         | 79.956(7)                                         |
| β/°                                         | 89.888(8)                                         |
| γ/°                                         | 81.369(7)                                         |
| Volume/Å <sup>3</sup>                       | 860.17(13)                                        |
| Z                                           | 2                                                 |
| ρ <sub>calc</sub> /mg/mm <sup>3</sup>       | 1.538                                             |
| m/mm <sup>-1</sup>                          | 2.416                                             |
| F(000)                                      | 408.0                                             |
| Crystal size/mm <sup>3</sup>                | 0.35 × 0.32 × 0.31                                |
| 2θ range for data collection                | 5.74 to 52.74°                                    |
| Index ranges                                | -6 ≤ h ≤ 6, -10 ≤ k ≤ 10, -25 ≤ l ≤ 20            |
| Reflections collected                       | 7194                                              |
| Independent reflections                     | 3460[R(int) = 0.0513]                             |
| Data/restraints/parameters                  | 3460/4/232                                        |
| Goodness-of-fit on F <sup>2</sup>           | 1.025                                             |
| Final R indexes [I ≥ 2σ (I)]                | R <sub>1</sub> = 0.0586, wR <sub>2</sub> = 0.1258 |
| Final R indexes [all data]                  | R <sub>1</sub> = 0.0965, wR <sub>2</sub> = 0.1487 |
| Largest diff. peak/hole / e Å <sup>-3</sup> | 0.52/-0.62                                        |

Table S2 Fractional Atomic Coordinates ( $\times 10^4$ ) and Equivalent Isotropic Displacement Parameters ( $\text{\AA}^2 \times 10^3$ ) for **1**.  $U_{\text{eq}}$  is defined as 1/3 of the trace of the orthogonalised  $U_{ij}$  tensor.

| Atom | x         | y         | z          | $U_{\text{eq}}$ |
|------|-----------|-----------|------------|-----------------|
| Br1  | 1788.9(9) | 1712.7(6) | 1297.6(2)  | 68.3(2)         |
| O3   | 1077(6)   | 3576(4)   | 3693.9(14) | 56.4(8)         |
| O2   | 11388(6)  | -1514(4)  | 4193.2(14) | 55.3(8)         |
| O1   | 14547(6)  | -3270(4)  | 3622.1(15) | 56.7(8)         |
| N1   | 13478(7)  | -3946(4)  | 1382.7(16) | 45.9(8)         |
| O4   | 15809(8)  | -2996(6)  | 124.1(19)  | 103.6(15)       |
| O5   | 7400(7)   | 9217(5)   | 1500(2)    | 83.7(11)        |
| C6   | 13034(8)  | -2858(5)  | 3096(2)    | 45.5(10)        |
| C3   | 16239(8)  | -4720(5)  | 2558(2)    | 53.6(11)        |
| C4   | 13980(7)  | -3603(5)  | 2508.3(19) | 41.5(9)         |
| C11  | 3809(8)   | 1818(5)   | 3137(2)    | 49.3(10)        |
| C7   | 10743(8)  | -1797(5)  | 3081(2)    | 45.6(10)        |
| C8   | 9990(8)   | -1096(5)  | 3647(2)    | 43.9(10)        |
| C5   | 12646(8)  | -3243(5)  | 1906(2)    | 46.2(10)        |
| C9   | 7636(8)   | 113(5)    | 3662.5(19) | 42.5(9)         |
| C12  | 3244(8)   | 2430(5)   | 3720(2)    | 45.1(10)        |
| C14  | 7024(9)   | 733(5)    | 4244(2)    | 49.2(10)        |
| C13  | 4860(8)   | 1882(5)   | 4281(2)    | 51.5(11)        |
| C1   | 15678(9)  | -5049(5)  | 1436(2)    | 54.6(11)        |
| C15  | 365(10)   | 4173(6)   | 4296(2)    | 62.7(13)        |
| C16  | 12048(9)  | -3463(6)  | 730(2)     | 60.9(13)        |
| C10  | 5980(8)   | 682(5)    | 3107(2)    | 47.1(10)        |
| C17  | 13308(10) | -2221(7)  | 261(2)     | 70.7(14)        |
| C2   | 17085(9)  | -5436(6)  | 2014(2)    | 58.7(12)        |

Table S3 Anisotropic Displacement Parameters ( $\text{\AA}^2 \times 10^3$ ) for **1**. The Anisotropic displacement factor exponent takes the form:  $-2\pi^2[h^2a^*2U_{11} + \dots + 2hka \times b \times U_{12}]$

| Atom | $U_{11}$ | $U_{22}$ | $U_{33}$ | $U_{23}$  | $U_{13}$ | $U_{12}$ |
|------|----------|----------|----------|-----------|----------|----------|
| Br1  | 64.5(4)  | 71.7(4)  | 67.4(4)  | -20.4(2)  | 9.0(2)   | 3.2(3)   |
| O3   | 63(2)    | 48.4(18) | 54.4(19) | -15.8(13) | 3.3(14)  | 9.5(15)  |
| O2   | 62(2)    | 56(2)    | 43.8(18) | -13.7(14) | -4.3(15) | 9.0(16)  |
| O1   | 59(2)    | 55(2)    | 52(2)    | -13.8(15) | -2.4(16) | 9.3(15)  |
| N1   | 50(2)    | 42(2)    | 44(2)    | -12.1(15) | 5.8(16)  | 0.8(16)  |
| O4   | 94(3)    | 114(4)   | 82(3)    | 17(2)     | 29(2)    | 11(3)    |

|     |       |       |        |           |          |          |
|-----|-------|-------|--------|-----------|----------|----------|
| O5  | 64(3) | 65(3) | 113(3) | -3(2)     | -8(2)    | 7(2)     |
| C6  | 49(3) | 37(2) | 49(3)  | -6.3(17)  | 0(2)     | -3.8(19) |
| C3  | 54(3) | 52(3) | 49(3)  | -4(2)     | 4(2)     | 6(2)     |
| C4  | 44(2) | 34(2) | 44(2)  | -4.6(16)  | 6.0(18)  | -1.2(18) |
| C11 | 57(3) | 49(3) | 39(2)  | -9.8(18)  | -3.3(19) | 3(2)     |
| C7  | 47(2) | 42(2) | 46(2)  | -12.8(17) | 0.2(18)  | 4.7(19)  |
| C8  | 51(3) | 37(2) | 44(2)  | -7.4(17)  | 1.7(19)  | -7.6(19) |
| C5  | 47(2) | 38(2) | 53(3)  | -12.5(18) | 7.7(19)  | 3.3(18)  |
| C9  | 50(2) | 37(2) | 41(2)  | -8.4(16)  | 3.7(18)  | -3.2(18) |
| C12 | 47(2) | 35(2) | 50(3)  | -5.2(17)  | 2.8(19)  | -0.5(18) |
| C14 | 60(3) | 47(3) | 40(2)  | -10.9(18) | -4.1(19) | -1(2)    |
| C13 | 60(3) | 48(3) | 48(3)  | -19.4(19) | 4(2)     | 1(2)     |
| C1  | 59(3) | 46(3) | 59(3)  | -16(2)    | 15(2)    | -1(2)    |
| C15 | 67(3) | 56(3) | 63(3)  | -19(2)    | 12(2)    | 8(2)     |
| C16 | 61(3) | 68(3) | 54(3)  | -23(2)    | -5(2)    | 5(3)     |
| C10 | 59(3) | 45(2) | 38(2)  | -12.8(17) | 3.1(19)  | -2(2)    |
| C17 | 87(4) | 67(3) | 52(3)  | -10(2)    | 2(3)     | 7(3)     |
| C2  | 58(3) | 48(3) | 63(3)  | -6(2)     | 10(2)    | 9(2)     |

Table S4 Bond Lengths for **1**.

| Atom | Atom | Length/Å | Atom | Atom | Length/Å |
|------|------|----------|------|------|----------|
| O3   | C12  | 1.364(5) | C4   | C5   | 1.370(6) |
| O3   | C15  | 1.423(5) | C11  | C12  | 1.380(5) |
| O2   | C8   | 1.293(5) | C11  | C10  | 1.374(5) |
| O1   | C6   | 1.293(5) | C7   | C8   | 1.405(5) |
| N1   | C5   | 1.340(5) | C8   | C9   | 1.474(5) |
| N1   | C1   | 1.353(5) | C9   | C14  | 1.385(5) |
| N1   | C16  | 1.482(5) | C9   | C10  | 1.390(5) |
| O4   | C17  | 1.418(6) | C12  | C13  | 1.386(5) |
| C6   | C4   | 1.487(5) | C14  | C13  | 1.381(6) |
| C6   | C7   | 1.376(5) | C1   | C2   | 1.347(6) |
| C3   | C4   | 1.383(5) | C16  | C17  | 1.507(7) |
| C3   | C2   | 1.383(6) |      |      |          |

Table S5 Bond Angles for **1**.

| Atom | Atom | Atom | Angle/°  | Atom | Atom | Atom | Angle/°  |
|------|------|------|----------|------|------|------|----------|
| C12  | O3   | C15  | 117.4(3) | C7   | C8   | C9   | 123.6(4) |
| C5   | N1   | C1   | 120.6(4) | N1   | C5   | C4   | 121.6(4) |
| C5   | N1   | C16  | 120.0(3) | C14  | C9   | C8   | 119.9(4) |
| C1   | N1   | C16  | 119.4(3) | C14  | C9   | C10  | 117.7(4) |
| O1   | C6   | C4   | 114.8(3) | C10  | C9   | C8   | 122.4(3) |
| O1   | C6   | C7   | 122.4(4) | O3   | C12  | C11  | 115.9(4) |
| C7   | C6   | C4   | 122.8(4) | O3   | C12  | C13  | 124.2(4) |
| C2   | C3   | C4   | 120.4(4) | C11  | C12  | C13  | 119.8(4) |
| C3   | C4   | C6   | 120.6(4) | C13  | C14  | C9   | 122.0(4) |
| C5   | C4   | C6   | 121.9(3) | C14  | C13  | C12  | 119.0(4) |
| C5   | C4   | C3   | 117.5(4) | C2   | C1   | N1   | 120.4(4) |
| C10  | C11  | C12  | 120.4(4) | N1   | C16  | C17  | 110.9(4) |
| C6   | C7   | C8   | 120.1(4) | C11  | C10  | C9   | 120.9(4) |
| O2   | C8   | C7   | 119.9(4) | O4   | C17  | C16  | 107.6(4) |
| O2   | C8   | C9   | 116.6(3) | C1   | C2   | C3   | 119.5(4) |

Table S6 Hydrogen Bonds for **1**.

| D  | H   | A                | d(D-H)/Å  | d(H-A)/Å | d(D-A)/Å | D-H-A/° |
|----|-----|------------------|-----------|----------|----------|---------|
| O4 | H4  | Br1 <sup>1</sup> | 0.82      | 2.42     | 3.213(4) | 163.5   |
| O2 | H2  | O1               | 0.85(2)   | 1.64(4)  | 2.464(4) | 163(10) |
| O1 | H1  | O2               | 0.85(2)   | 1.74(7)  | 2.464(4) | 143(10) |
| O5 | H5A | Br1 <sup>2</sup> | 0.846(19) | 2.47(2)  | 3.303(4) | 169(5)  |
| O5 | H5B | Br1 <sup>3</sup> | 0.852(19) | 2.50(3)  | 3.315(4) | 161(5)  |

<sup>1</sup>2-X,-Y,-Z; <sup>2</sup>1+X,1+Y,+Z; <sup>3</sup>+X,1+Y,+Z

Table S7 Hydrogen Atom Coordinates (Å×10<sup>4</sup>) and Isotropic Displacement Parameters (Å<sup>2</sup>×10<sup>3</sup>) for **1**.

| Atom | x     | y     | z    | U(eq) |
|------|-------|-------|------|-------|
| H4   | 16345 | -2473 | -215 | 124   |
| H3   | 17194 | -4992 | 2959 | 64    |
| H11  | 2713  | 2176  | 2762 | 59    |
| H7   | 9692  | -1543 | 2695 | 55    |
| H5   | 11125 | -2491 | 1859 | 55    |
| H14  | 8105  | 364   | 4621 | 59    |

|      |            |            |          |    |
|------|------------|------------|----------|----|
| H13  | 4491       | 2283       | 4677     | 62 |
| H1A  | 16223      | -5543      | 1072     | 66 |
| H15A | -1189      | 4960       | 4214     | 94 |
| H15B | 1733       | 4690       | 4441     | 94 |
| H15C | 72         | 3272       | 4638     | 94 |
| H16A | 10277      | -2997      | 802      | 73 |
| H16B | 12008      | -4431      | 527      | 73 |
| H10  | 6348       | 288        | 2710     | 57 |
| H17A | 12288      | -1855      | -152     | 85 |
| H17B | 13439      | -1272      | 468      | 85 |
| H2A  | 18614      | -6179      | 2048     | 70 |
| H2   | 12660(140) | -2130(110) | 4060(50) | 70 |
| H1   | 13980(190) | -2820(120) | 3950(40) | 70 |
| H5A  | 8380(90)   | 9940(50)   | 1400(30) | 88 |
| H5B  | 5820(50)   | 9650(70)   | 1430(30) | 88 |
